# Supplementary material for: A Major Role for Perifornical Orexin Neurons in the Control of Glucose Metabolism in Rats
Source: Oxford University Press journal article supplement (doi:10.2337/db09-0385), 2009-07-10

**Supplemental data.1**

Table 1. Stereotactic coordinates for placements of microdialysis and i.c.v. probes.

(mm) Anteroposterior Lateral Ventral Angle

PF-Oa -2.4 2.5 -8.1 10

dDMH -2.4 2.0 -7.9 10

PVN -1.6 2.0 -7.9 10

i.c.v. -0.8 2.0 -3.2 0

Tooth bar was set as -3.2 mm. The ventral coordinates were standardized for 300g BW, every additional 25g BW will be placed 0.1 mm deeper.

**Supplemental data.2**

**Immunocytochemistry**

Two groups of brain sections were incubated overnight at 4°C with goat anti-Fos (1:1500; Santa Cruz Biotechnology, Inc., Santa Cruz, CA) and rabbit anti-orexin or rabbit anti-MCH (1:2000; Phoenix Pharmaceuticals, Belmont, CA) primary antibodies. Sections were then rinsed in 0.1M TBS, incubated 1 hr in biotinylated horse anti-goat IgG, and then 1 h in avidin–biotin complex (ABC, Vector Laboratories, Inc., Burlingame, CA), the reaction product was visualized by incubation in 1% diaminobenzidine (DAB) (0.05% nickel ammonium sulphate was added to the DAB solution to darken the reaction product, DAB/Ni) with 0.01% hydrogen peroxide for 5-7 min. After Fos immunostaining, sections were rinsed in 0.1M TBS, incubated 1 h in biotinylated goat anti-rabbit IgG, and then 1 h in ABC, the reaction product was visualized by DAB staining only. Sections were mounted on gelatine-coated glass slides, dried, run through ethanol and xylene and covered for observation by light microscopy.

**Supplemental data.3**

Table 2, RT-PCR primer

**Gene Forward primer Reverse primer**

Pepck TGCCCTCTCCCCTTAAAAAAG CGCTTCCGAAGGAGATGATCT

G6Pase CCCATCTGGTTCCACATTCAA GGCGCTGTCCAAAAAGAATC

Glucokinase TCCTCCTCAATTGGACCAAGG TGCCACCACATCCATCTCAA

IL-6 TGCCCTTCAGGAACAGCTATG TGTCAACAACATCAGTCCCAAGAA

TNF-a CTAACTCCCAGAAAAGCAAGCAA CCTCGGGCCAGTGTATGAGA

SOCS3 CCTCCAGCATCTTTGTCGGAAGAC TACTGGTCCAGGAACTCCCGAATG

Ubi* CTCCAACAGGACCTGCTGAAC CTGAAGAGAATCCACAAGGAATTGA

* Ubi: ubiquitin conjugate enzyme, as reference gene

**Supplemental data.4**

Supplemental Figure.1. Supplemental Figure.1 EGP response to Ringer’s retrodialysis into hypothalamus or purified water i.c.v. infusion. Food was removed from the rat’s home cage at the beginning of the light period. Experiments started five hours later, after the baseline samples for calculating the equilibration of isotope tracer [6.6-2H2] glucose were taken between 90-100 min. Rats received either Ringer’s retrodialysis into the hypothalamus (3μl/min) or purified water i.c.v. (5μl/hr), blood samples were taken continuously during 2 hrs with a 50 min intervals. With similar basal EGP, both groups show similar decline of EGP along the 2 hrs sampling period and also ended up with similar EGP's at the last time point (t=250 min, 54.9±0.74 vs 54.8 ± 2.52 μmol/kg.min, p=0.65). Another group of rats that went through a similar fasting protocol but without any brain infusion~~s~~ showed a similar EGP on each time point Under *ad libitum* conditions, without any brain infusion, EGP does not show a declining trend. This indicates that the decline of EGP is an endogenous process resulting from the removal of food from rats’ home cage at the beginning of the light period, and not from the brain infusion.


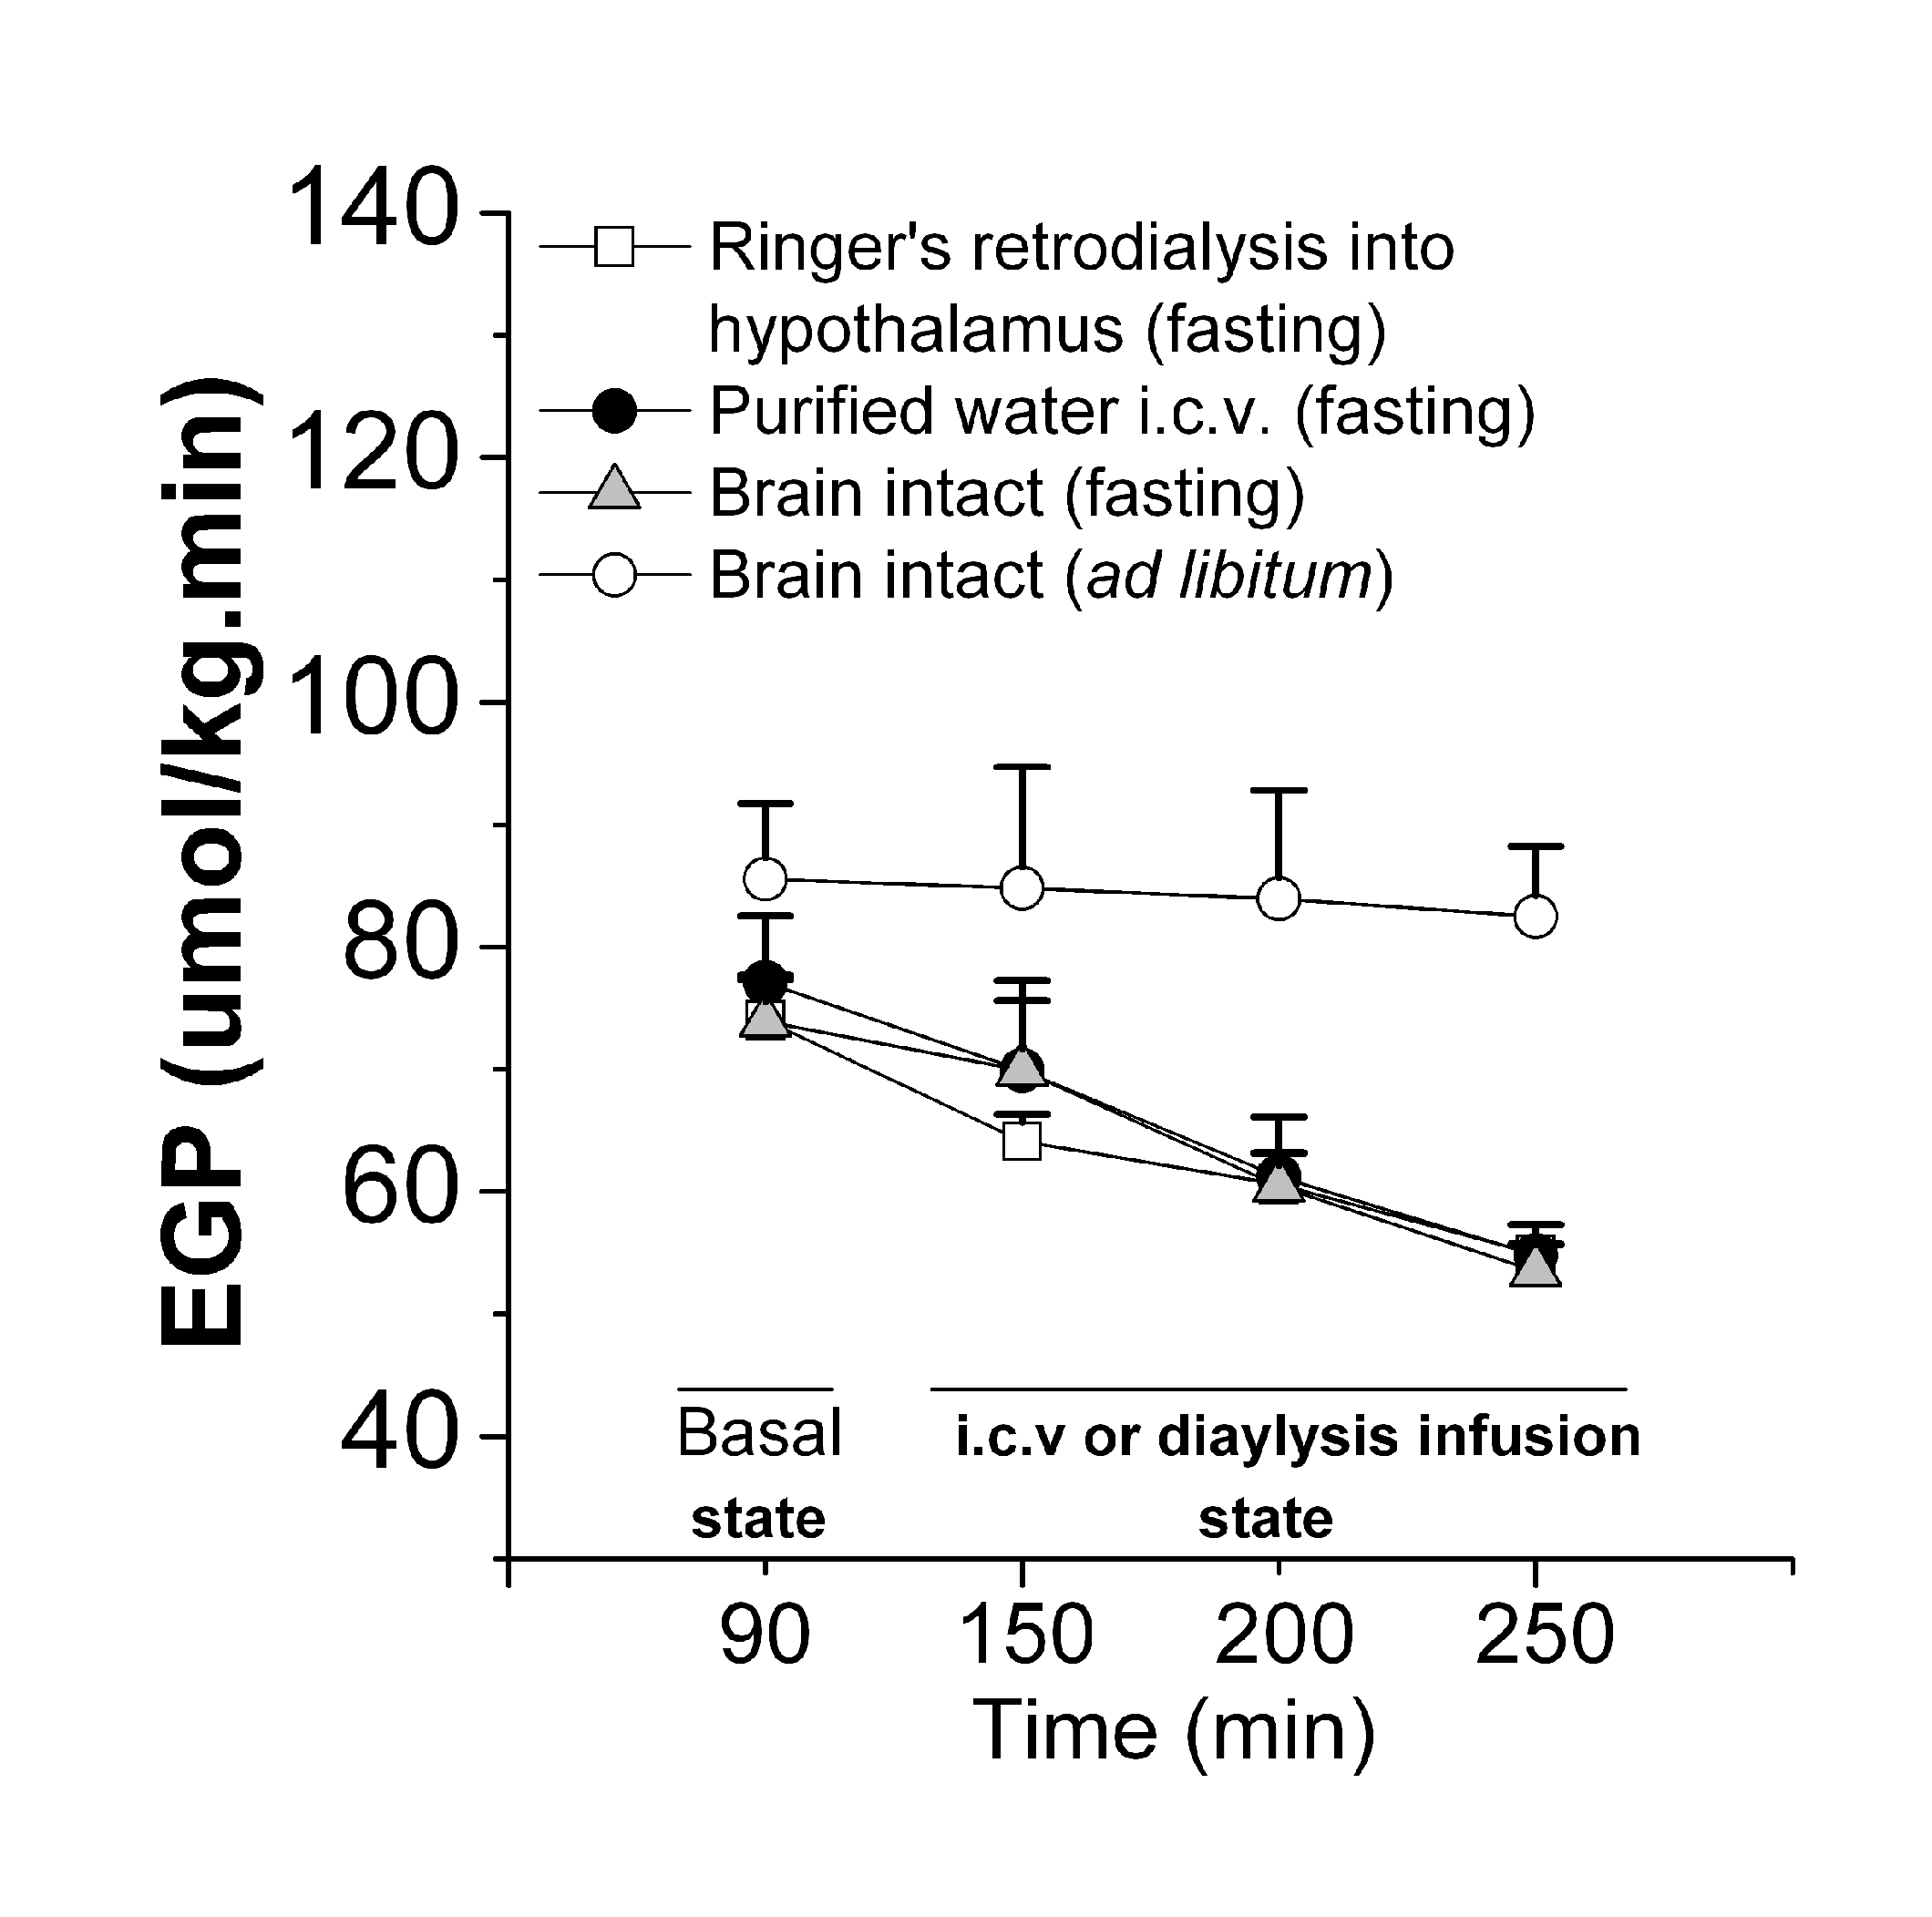


**Supplemental data.5**

Supplemental Figure.2 Orexin neurons (dark brown) and Fos positive orexin neurons were counted in the rectangle box outlined in a Nissl staining (blue) section (1.5 mm x 1 mm). III, third ventricle, f: fornix. Scale bar: 50μm.


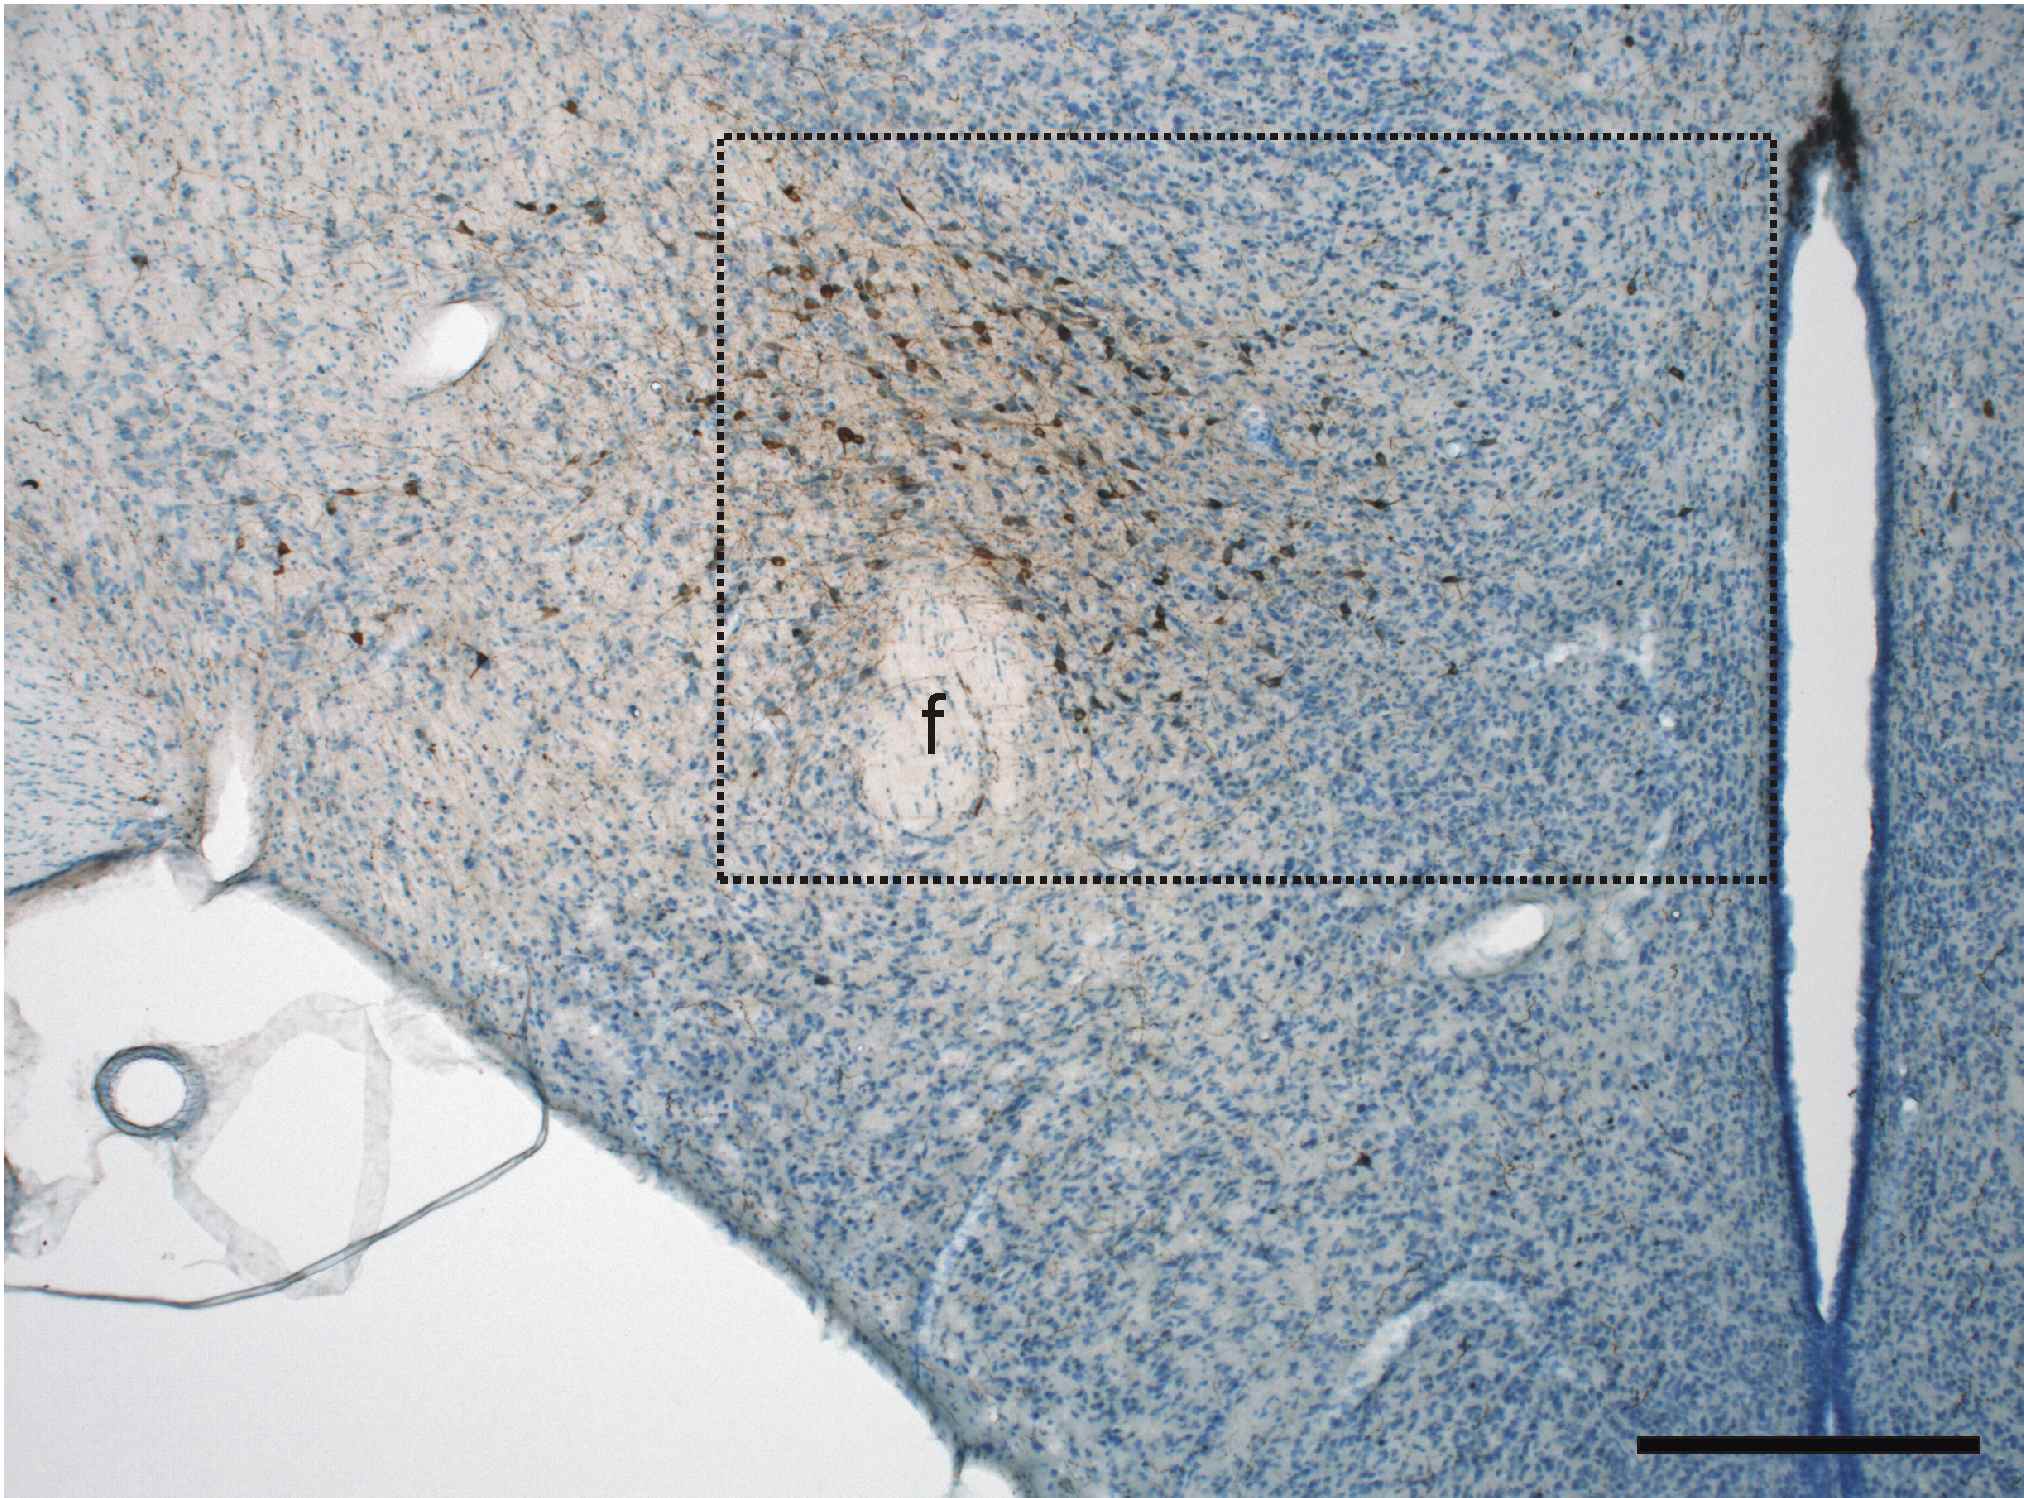

Supplement: db090385-sup-db0385_online_appendix.doc [file db090385-sup-db0385_online_appendix.doc]
